# Supplementary material for: Computational Insights into the Allosteric Modulation of a Phthalate-Degrading Hydrolase by Distal Mutations
Source: Preprints.org preprint supplement (doi:10.20944/preprints202302.0237.v1), 2023-02-14
Supplement: Supplementary file 1 [file supplementary]

## Supplementary information

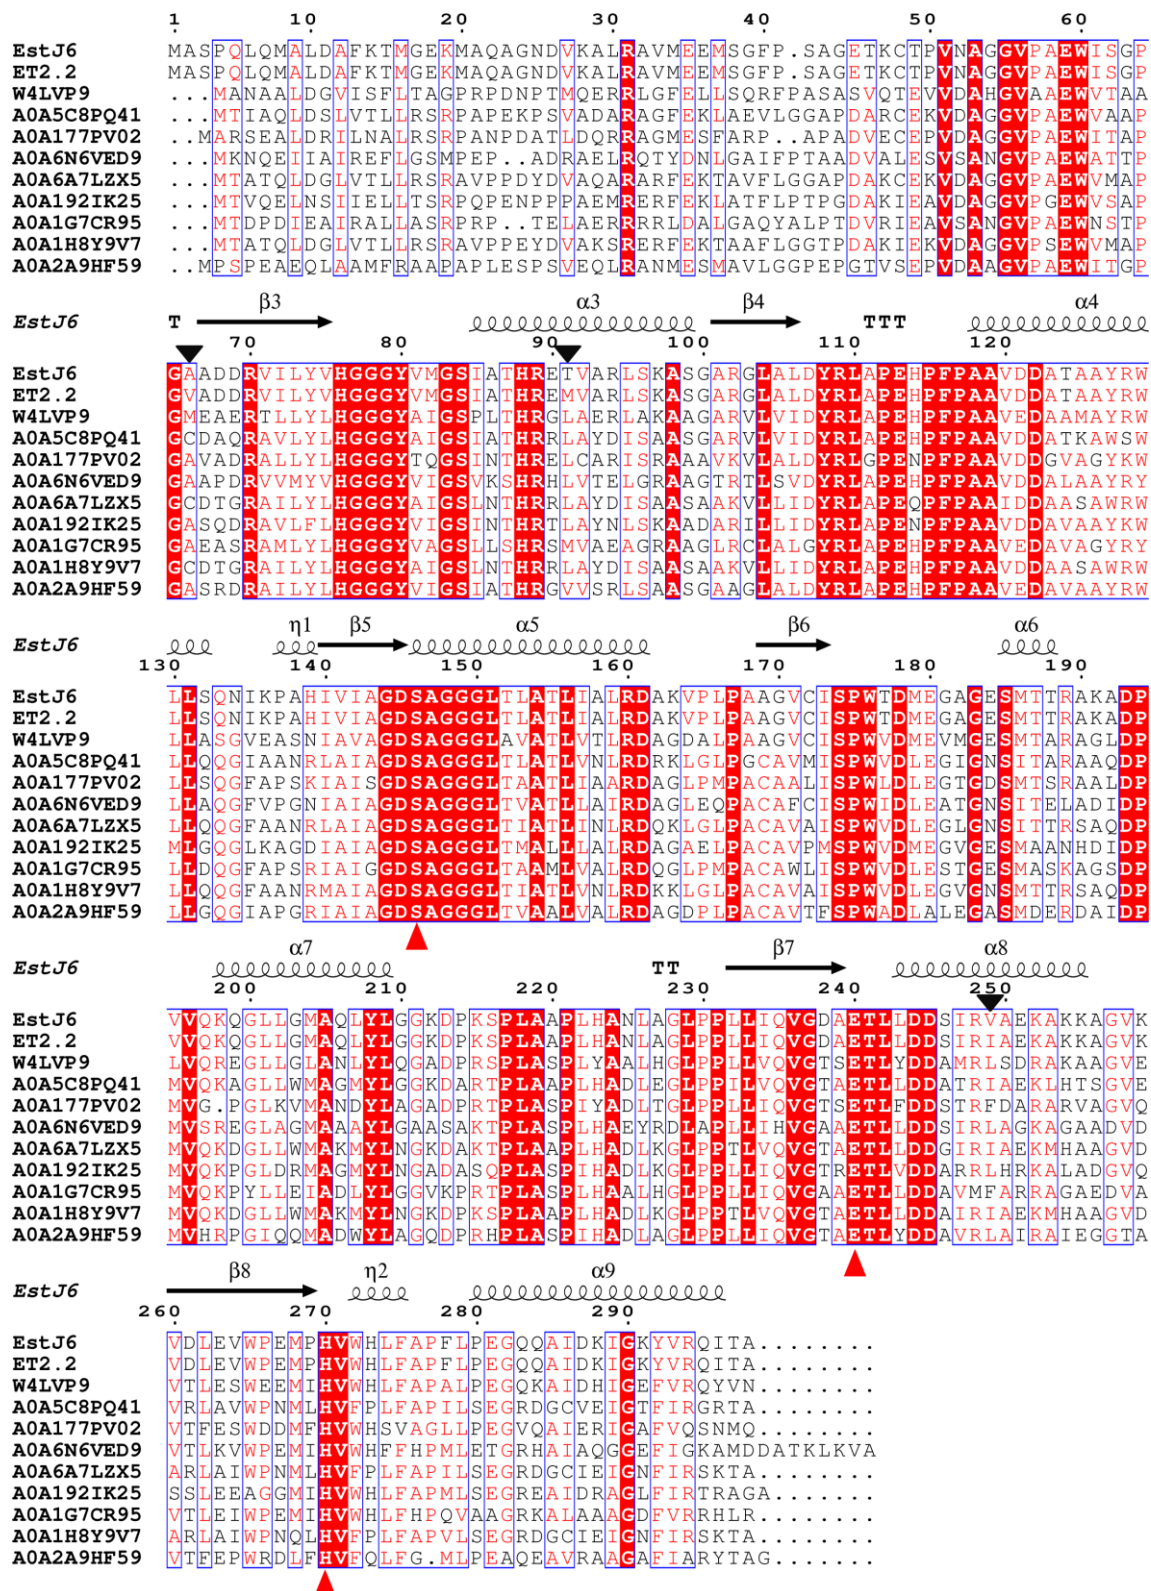

**Figure S1.** Sequence alignment of EstJ6 and its homologous proteins from the family IV (sequences similarity  $\geq 57\%$ ). Highly conservative residues are shading in red. The mutated sites and triads are indicated by black and red triangles, respectively.

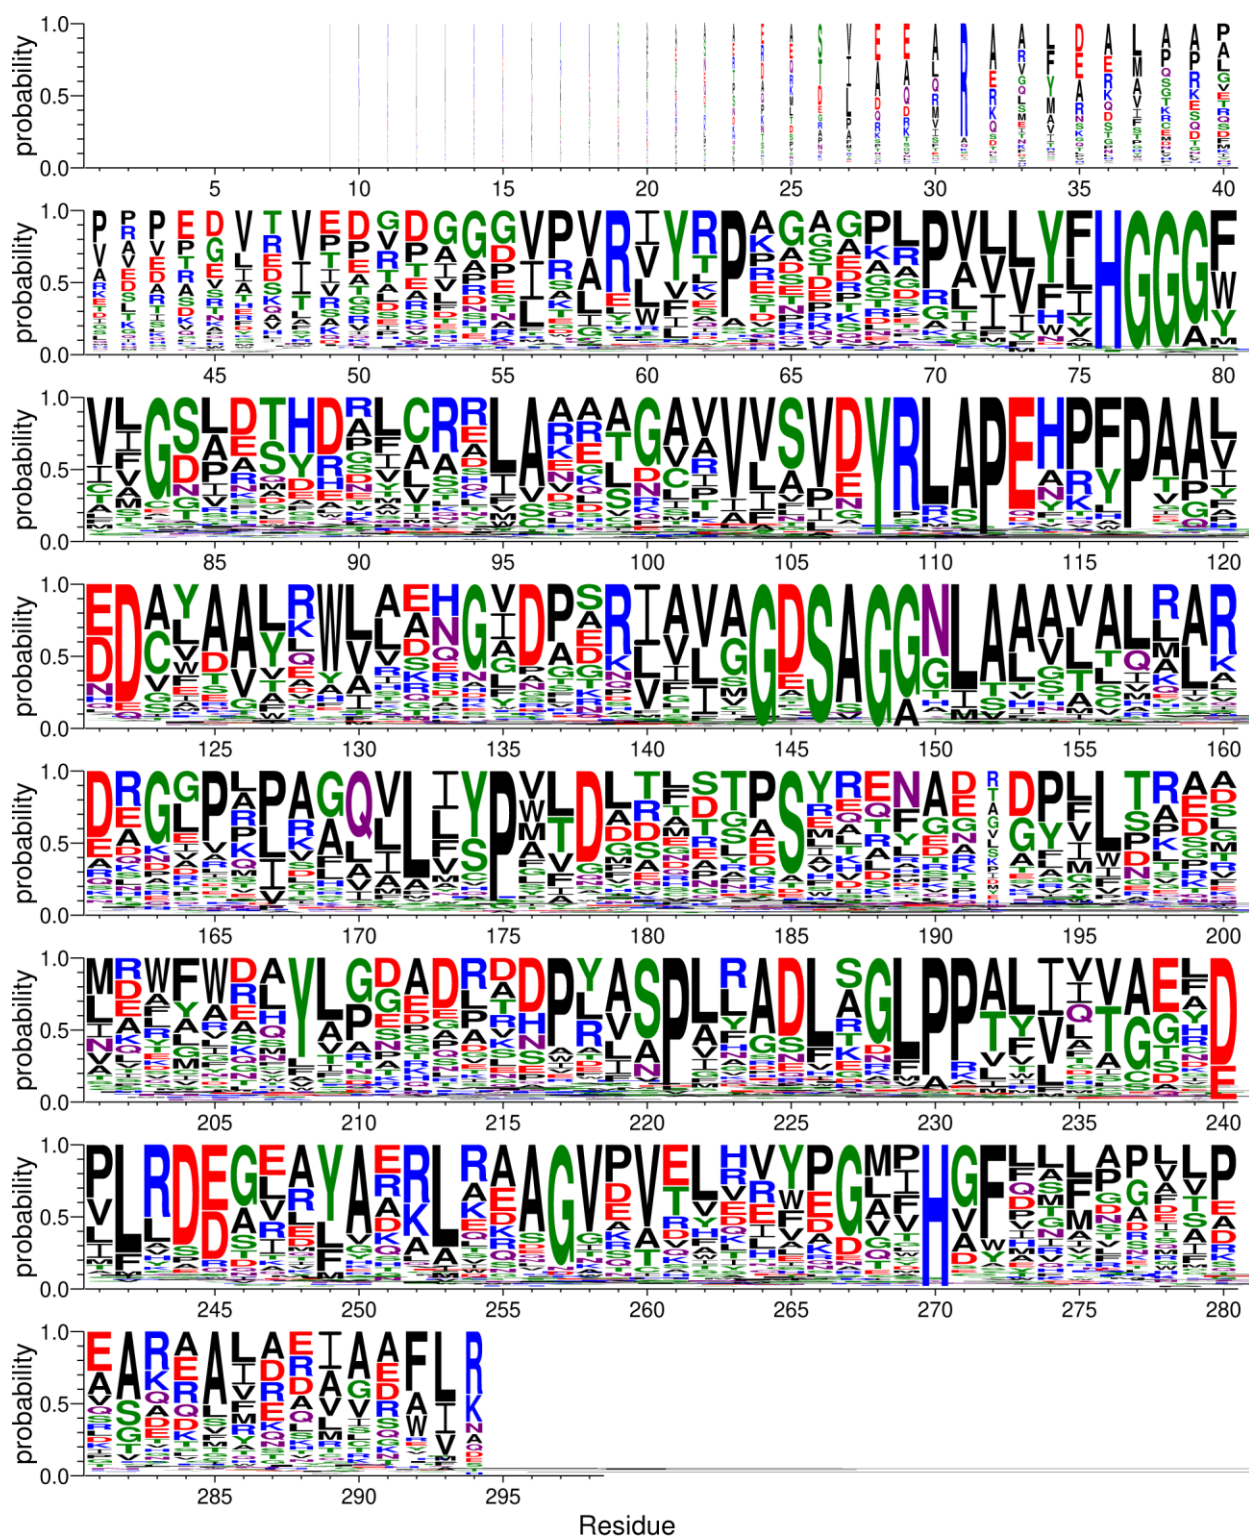

**Figure S2.** Sequence logo presentation of full-length EstJ6.

# Ramachandran Plot

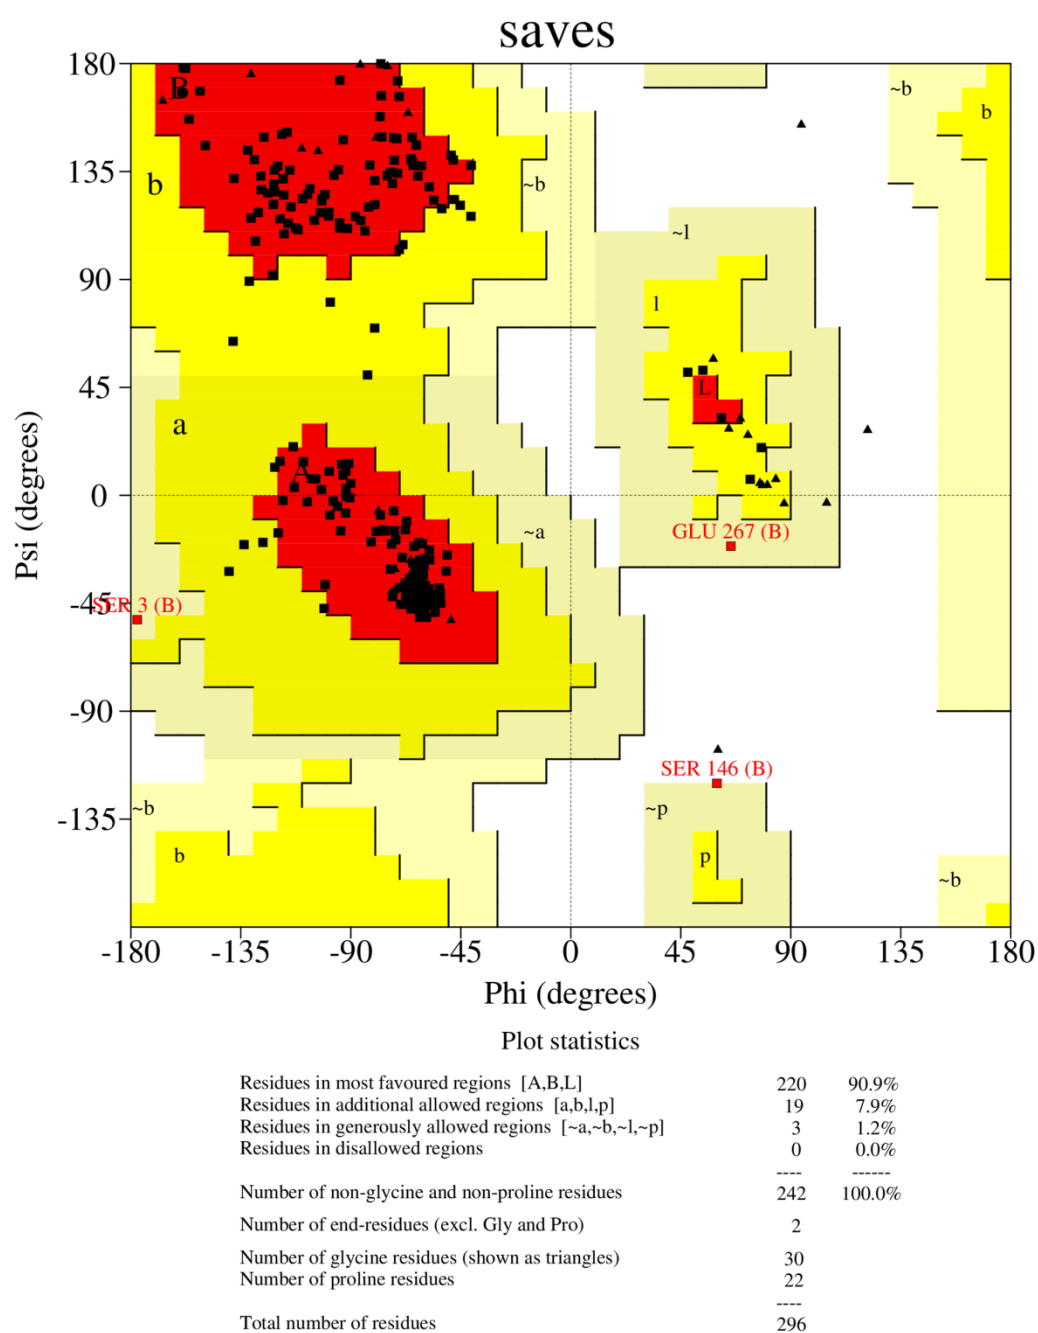

**Figure S3.** The Ramachandran map of EstJ6 structure predicted by Swiss-model server. Statistical data shows 90.9% residues reside in the most favored regions, which indicates the rationality of model structure.

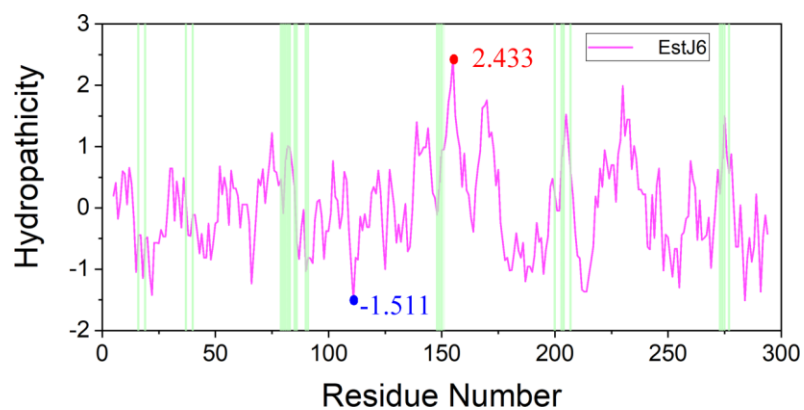

**Figure S4.** The hydropathicity scores of residues in EstJ6. The min- and max-values are -1.551 and 2.433, respectively. The green shadow indicates pocket residues.

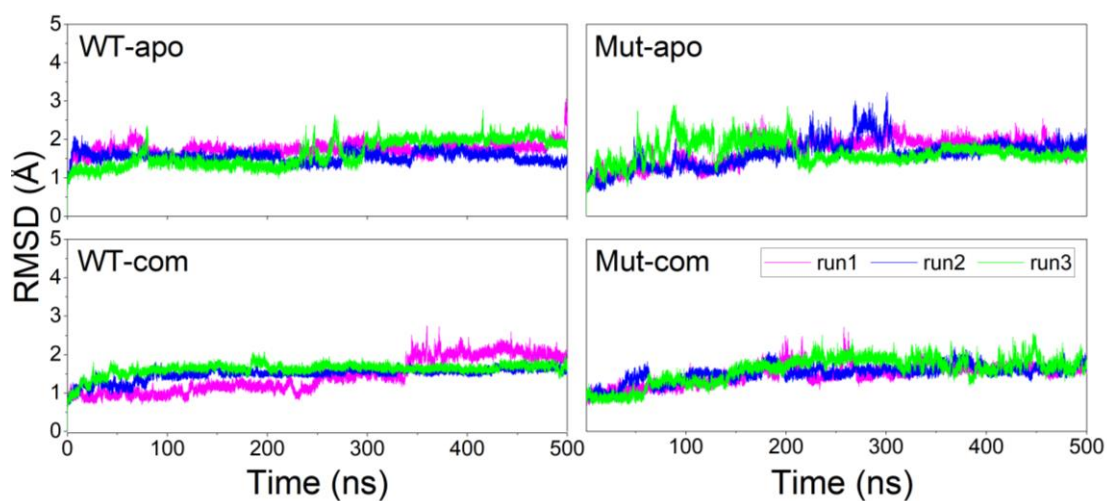

**Figure S5.** Root-mean-square deviations (RMSDs) of protein Cα atoms in the four systems.

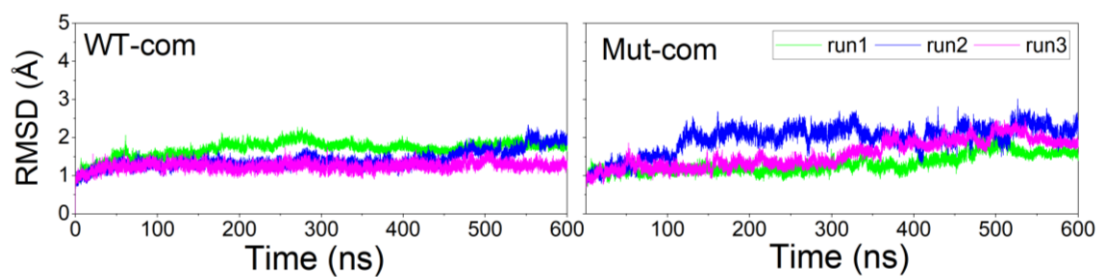

**Figure S6.** Cα Root-mean-square deviations (RMSDs) in simulations with distance restraints.



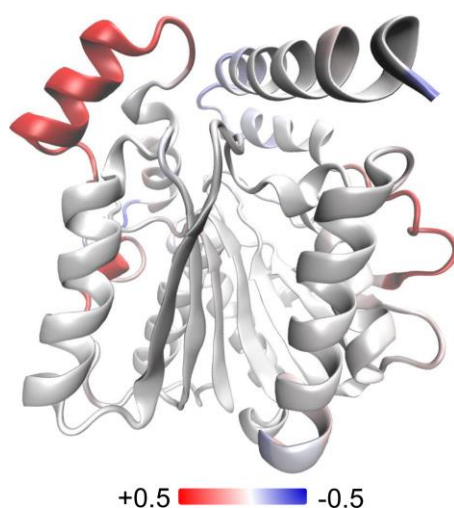

**Figure S7.** RMSF differences upon mutations for complex systems with distance restraints. The differences were mapped onto protein structure, displayed according to a color scale (lower and higher flexibilities depicted in blue and red, respectively).

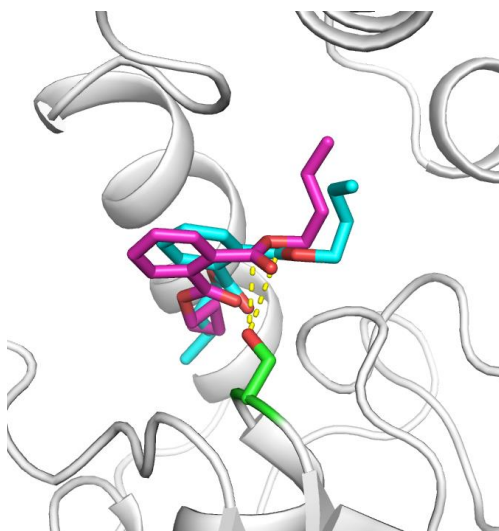

**Figure S8.** The dominant states of DBP<sup>WT</sup> (cyan) and DBP<sup>Mut</sup> (magenta) in the active site. S146 is shown as green sticks. The distance from the carbonyl carbon of DBP to the side-chain oxygen atom of S146 is 3.8 Å in WT-com and 3.6 Å in Mut-com.

**Table S1.** The frequency of several crucial residues and mutation sites of ET2.2 (0%: least conservative, 100%: immutability).

| Residue                                    | Frequency                      |
|--------------------------------------------|--------------------------------|
| <b>Catalytic triads</b>                    | <b>S146</b> 97.17%             |
|                                            | <b>E240/D240</b> 23.88%/74.13% |
|                                            | <b>H270</b> 97.18%             |
| <b>Other crucial conservative residues</b> | <b>H76</b> 94.73%              |
|                                            | <b>G77</b> 95.2%               |
|                                            | <b>G78</b> 94.53%              |
|                                            | <b>A147</b> 82.75%             |
| <b>Mutations</b>                           | <b>A67</b> 11.23%              |
|                                            | <b>T91</b> 4.53%               |
|                                            | <b>V249</b> 2.1%               |

**Table S2.** The means and deviations of RMSD and  $R_g$  values of pocket residues.

| Systems        | Pocket-RMSD (Å) | Pocket- $R_g$ (Å) |
|----------------|-----------------|-------------------|
| <b>WT-apo</b>  | 2.12 ± 0.16     | 9.33 ± 0.37       |
| <b>Mut-apo</b> | 1.71 ± 0.17     | 9.26 ± 0.16       |
| <b>WT-com</b>  | 2.09 ± 0.30     | 9.58 ± 0.18       |
| <b>Mut-com</b> | 2.08 ± 0.23     | 9.56 ± 0.20       |

**Table S3.** The binding free energy contribution of essential residues in the pocket.

|             | WT-com (kcal/mol) | Mut-com (kcal/mol) |
|-------------|-------------------|--------------------|
| <b>G78</b>  | -0.47 ± 0.53      | -0.67 ± 1.08       |
| <b>G79</b>  | -0.21 ± 0.30      | -0.89 ± 0.40       |
| <b>Y80</b>  | -0.74 ± 0.16      | -0.87 ± 0.23       |
| <b>S146</b> | -0.23 ± 0.17      | -0.72 ± 0.49       |
| <b>A147</b> | -0.41 ± 0.09      | -1.11 ± 0.68       |
| <b>W176</b> | -2.11 ± 0.33      | -2.52 ± 0.70       |
| <b>L201</b> | -1.99 ± 0.63      | -1.32 ± 0.18       |

**Table S4.** Prediction of potential disulfide bonds in EstJ6. The residue pairs, within 10 Å of triads and 5 Å of lid region colored in red, are out of consideration for disulfide bond engineering. The blue ones represent high conservative residues, beyond 10 Å of triads and 5 Å of lid region.

| Res1 ID | Res1 AA | Res2 ID | Res2 AA | Chi3    | Energy | Sum<br>B-Factors |
|---------|---------|---------|---------|---------|--------|------------------|
| 13      | PHE     | 194     | PRO     | -98.08  | 0.95   | 1.76             |
| 13      | PHE     | 195     | VAL     | -104.8  | 6.02   | 1.75             |
| 23      | ALA     | 29      | ALA     | 79.71   | 4.37   | 1.76             |
| 26      | ASP     | 29      | ALA     | 95.41   | 1.96   | 1.75             |
| 53      | ALA     | 58      | ALA     | 86.07   | 0.35   | 1.87             |
| 54      | GLY     | 125     | ALA     | -112.16 | 3.68   | 1.89             |
| 63      | GLY     | 96      | SER     | -116.63 | 3.99   | 1.85             |
| 63      | GLY     | 97      | LYS     | 78.36   | 5.51   | 1.79             |
| 75      | VAL     | 148     | GLY     | 74.49   | 3.63   | 1.99             |
| 76      | HIS     | 88      | HIS     | 115.96  | 5.17   | 1.88             |
| 77      | GLY     | 145     | ASP     | -90.95  | 1.79   | 1.96             |
| 80      | TYR     | 208     | TYR     | 95.14   | 2.81   | 1.88             |
| 99      | SER     | 101     | ALA     | -106.55 | 3.19   | 1.89             |
| 108     | TYR     | 122     | ASP     | 105.89  | 2.88   | 1.92             |
| 109     | ARG     | 114     | HIS     | -74.86  | 4.5    | 1.81             |
| 114     | HIS     | 118     | ALA     | 86.8    | 4.27   | 1.88             |
| 123     | ALA     | 155     | THR     | 125.85  | 2.01   | 1.96             |
| 140     | ILE     | 167     | PRO     | -108.97 | 3.46   | 1.93             |
| 145     | ASP     | 173     | ILE     | -89.99  | 2.39   | 1.95             |
| 149     | GLY     | 172     | CYS     | 95.2    | 5.2    | 1.99             |
| 153     | LEU     | 221     | PRO     | -72.55  | 2.73   | 1.93             |
| 177     | THR     | 222     | LEU     | 108.17  | 7.38   | 1.9              |
| 179     | MET     | 205     | ALA     | 101.77  | 4.3    | 1.85             |
| 185     | SER     | 243     | LEU     | 85.28   | 4.79   | 1.86             |
| 192     | ALA     | 239     | ALA     | -106.24 | 3.9    | 1.82             |
| 216     | SER     | 219     | ALA     | 116.97  | 2.96   | 1.88             |
| 217     | PRO     | 224     | ALA     | 102.73  | 2.23   | 1.87             |
| 226     | LEU     | 256     | ALA     | -99.08  | 3      | 1.83             |
| 231     | PRO     | 259     | LYS     | 117.78  | 4.54   | 1.9              |
| 236     | VAL     | 246     | SER     | -90.92  | 0.75   | 1.92             |
| 250     | ALA     | 262     | LEU     | 121.14  | 6.85   | 1.88             |
| 253     | ALA     | 258     | VAL     | 106.6   | 5.84   | 1.88             |
| 275     | PHE     | 279     | LEU     | 84.38   | 1.16   | 1.8              |
| 276     | ALA     | 282     | GLY     | -78.65  | 0.28   | 1.86             |
| 279     | LEU     | 282     | GLY     | 87.48   | 2.61   | 1.84             |
