# Supplementary material for: Computational Insights into the Allosteric Modulation of a Phthalate-Degrading Hydrolase by Distal Mutations
Source: Preprints.org preprint supplement (doi:10.20944/preprints202302.0237.v1), 2023-02-14
Supplement: Supplementary file 2 [file supplementary]

Archive with 6 entries (6 files):
- SI.pdf
- Supplementary Video S1.mp4
- Supplementary Video S2.mp4
- __MACOSX/._SI.doc
- __MACOSX/._Supplementary Video S1.mp4
- __MACOSX/._Supplementary Video S2.mp4
